# Supplementary material for: Inequalities in the distribution of National Institutes of Health research project grant funding
Source: eLife journal article supplement (doi:10.7554/elife.71712), 2021-09-03
Supplement: data1 [file elife-71712-data1-v2.rdata]

Archive with 1 entries (1 files):
- elife-71712-data1-v2.rdata.out
